# Supplementary material for: Comparable Effects of Sleeve Gastrectomy and Roux-en-Y Gastric Bypass on Basal Fuel Metabolism and Insulin Sensitivity in Individuals with Obesity and Type 2 Diabetes
Source: Hindawi journal article supplement (doi:10.1155/2022/5476454), 2022-12-21
Supplement: f1 [file 5476454.f1.pdf]

|                               | Analysis comparing RYGB and SG |            |                     |            | Analysis comparing Control group, RYGB and SG |            |                     |            |
|-------------------------------|--------------------------------|------------|---------------------|------------|-----------------------------------------------|------------|---------------------|------------|
|                               | Three-way interaction          |            | Two-way interaction |            | Three-way interaction                         |            | Two-way interaction |            |
|                               | Group##Visit##Time             | Time#Group | Visit#Group         | Time#Visit | Group##Visit##Time                            | Time#Group | Visit#Group         | Time#Visit |
| Endogen glucose production    | 0.4884                         | 0.8883     | 0.7111              | 0.0038     | 0.6539                                        | 0.0205     | 0.7258              | 0.0312     |
| Rate of appereance            | 0.756                          | 0.3033     | 0.3726              | 0.0069     | 0.7612                                        | 0.0001     | 0.3804              | 0.0073     |
| Rate of disappereance         | 0.9579                         | 0.3523     | 0.3406              | 0.0015     | 0.958                                         | 0.0000     | 0.3603              | 0.0013     |
| M-value                       | 0.9702                         | 0.2600     | 0.5543              | 0.0170     | 0.9717                                        | 0.0000     | 0.5752              | 0.0219     |
| Glucose                       | 0.9489                         | 0.495      | 0.6681              | 0.000      | 0.9443                                        | 0.0000     | 0.6507              | 0.0000     |
| Insulin (Low-Dose, High-Dose) | 0.2791                         | 0.642      | 0.4618              | 0.9828     | 0.2667                                        | 0.8718     | 0.4519              | 0.9824     |
| c-peptide                     | 0.9322                         | 0.8899     | 0.4573              | 0.0000     | 0.9249                                        | 0.0000     | 0.4433              | 0.0000     |
| FFA (Low-Dose, High-Dose)     | 0.6544                         | 0.3005     | 0.8783              | 0.0101     | 0.2217                                        | 0.0072     | 0.8156              | 0.7243     |
| Glucagon                      | 0.965                          | 0.1173     | 0.1025              | 0.3573     | 0.959                                         | 0.2362     | 0.089               | 0.3069     |
| Non-oxidativ glucose storage  | 0.8901                         | 0.4799     | 0.6249              | 0.0148     | 0.9181                                        | 0.0000     | 0.6091              | 0.042      |
| Charbohydrate oxidation       | 0.7958                         | 0.563      | 0.4256              | 0.0115     | 0.8403                                        | 0.1808     | 0.4714              | 0.0307     |
| Lipid oxidation               | 0.2232                         | 0.6809     | 0.6661              | 0.0264     | 0.2457                                        | 0.8528     | 0.6742              | 0.0319     |
| Energy expenditure            | 0.4087                         | 0.5351     | 0.5632              | 0.2537     | 0.4383                                        | 0.1269     | 0.5697              | 0.285      |

Table A1. Interactions from the multilevel mixed effects linear regression model on Roux-en-Y Gastric Bypass and Sleeve Gastrectomy group. Main analysis marked blue: Factors: 1. Group (RYGB and SG), 2. Visit (pre and postoperative) 3. Time (insulin level during hyperinsulineamic euglycemic clamp). Secondary comparison to control group marked green: Factors: 1. Group (Control, RYGB and SG), 2. Visit (pre and postoperative) 3. Time (insulin level during hyperinsulineamic euglycemic glucose clamp).
