# Supplementary material for: Comparable Effects of Sleeve Gastrectomy and Roux-en-Y Gastric Bypass on Basal Fuel Metabolism and Insulin Sensitivity in Individuals with Obesity and Type 2 Diabetes
Source: Hindawi journal article supplement (doi:10.1155/2022/5476454), 2022-12-21
Supplement: f2 [file 5476454.f2.pdf]

## **Supplementary Appendix B:**

### **Energy expenditure**

EE decreased ~ 230 kcal/24 hour ( $p < 0.01$ ) following surgery in both groups ( $p < 0.01$ ). Levels were comparable between RYGB and CTS but tended to be higher following SG compared to CTS ( $p > 0.08$ ).

**Table B1**

Energy expenditure during indirect calorimetry

|                     |          | CTS          | RYGB pre     | RYGB post    | SG pre       | SG post      |
|---------------------|----------|--------------|--------------|--------------|--------------|--------------|
| <b>Basal</b>        |          | <b>n = 8</b> | <b>n = 9</b> | <b>n = 9</b> | <b>n = 6</b> | <b>n = 7</b> |
| Energy Expenditure  | kcal/24h | 1463 ± 111   | 1692 ± 79    | 1444 ± 60    | 1980 ± 132   | 1699 ± 101   |
| <b>Low insulin</b>  |          | <b>n = 7</b> | <b>n = 9</b> | <b>n = 9</b> | <b>n = 6</b> | <b>n = 7</b> |
| Energy Expenditure  | kcal/24h | 1421 ± 127   | 1595 ± 64    | 1443 ± 47    | 1992 ± 157   | 1684 ± 98    |
| <b>High insulin</b> |          | <b>n = 8</b> | <b>n = 9</b> | <b>n = 9</b> | <b>n = 6</b> | <b>n = 7</b> |
| Energy Expenditure  | kcal/24h | 1479 ± 116   | 1609 ± 75    | 1414 ± 38    | 1935 ± 151   | 1702 ± 101   |

Energy expenditure during basal conditions, low insulin infusion (0.5 mU/kg LBM/min) and high insulin infusion (1 mU/kg LBM/min) during a hyperinsulinaemic euglycemic clamp. Data are expressed as mean ± SEM. Abbreviations: CTS, control subjects; RYGB, roux-en-y gastric bypass group; SG, sleeve gastrectomy group; pre, preoperatively; post, postoperatively.
